# Supplementary material for: Functional Characterization of CsSWEET5a, a Cucumber Hexose Transporter That Mediates the Hexose Supply for Pollen Development and Rescues Male Fertility in Arabidopsis
Source: MDPI journal article supplement (doi:10.3390/ijms25021332), 2024-01-22
Supplement: s1 [file s1]

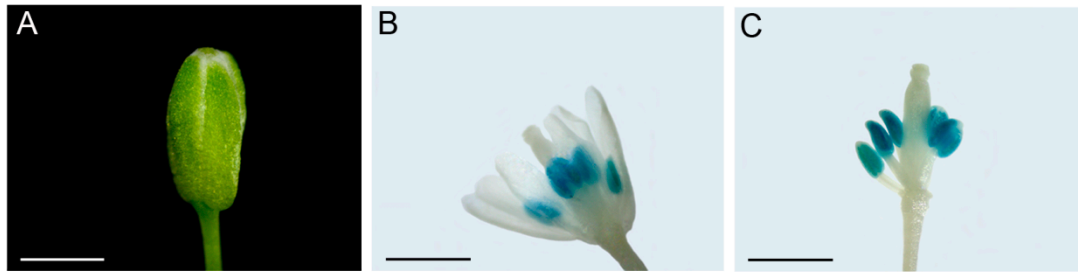

**Figure S2.** Histochemical staining of  $\beta$ -glucuronidase (*GUS*) activity in the flower buds of *pCsSWEET5a::GUS* transgenic *Arabidopsis* plants. Predominant *GUS* staining was observed in the anthers but not in sepals, petals, pistils, filaments, or peduncles. A and B are the same flower bud before and after *GUS* staining, respectively. C was obtained from B, whose sepals and petals were removed. Scale bars: 1 mm.
