# Supplementary material for: Functional Characterization of CsSWEET5a, a Cucumber Hexose Transporter That Mediates the Hexose Supply for Pollen Development and Rescues Male Fertility in Arabidopsis
Source: Int J Mol Sci. 2024 Jan 22;25(2):1332. doi: 10.3390/ijms25021332 (PMC10816302; doi:10.3390/ijms25021332)
Supplement: Supplementary file 1 [file ijms-25-01332-s001.zip › Table S1.xlsx]

## Sheet: Sheet1
	Table S1. Characteristics of the CsSWEET5a gene in cucumber.
	Gene	full length (bp)	ORF length (bp)	5’-untranslated region (bp)	3’-untranslated region (bp)	Protein physicochemical characteristics
						Length (aa)	MW (kDa)	pI	GRAVY
	CsSWEET5a	1139	717	175	247	238	26.93	9.18	0.69
	The ProtParam tool (https://web.expasy.org/protparam) was used to analyze the molecular weight (MW), isoelectric point (pI), and grand average of hydropathicity (GRAVY) of the deduced CsSWEET5a protein.
