# Supplementary material for: Functional Characterization of CsSWEET5a, a Cucumber Hexose Transporter That Mediates the Hexose Supply for Pollen Development and Rescues Male Fertility in Arabidopsis
Source: Int J Mol Sci. 2024 Jan 22;25(2):1332. doi: 10.3390/ijms25021332 (PMC10816302; doi:10.3390/ijms25021332)
Supplement: Supplementary file 1 [file ijms-25-01332-s001.zip › Table S2.xlsx]

## Sheet: Sheet1
	Table S2. Amino acid identity analysis of SWEET proteins from cucumber (CsSWEET5a) and other plant species.
		CsSWEET5a
	AtSWEET1	0.3889
	AtSWEET2	0.3238
	AtSWEET3	0.3132
	AtSWEET4	0.5538
	AtSWEET5	0.6058
	AtSWEET6	0.4215
	AtSWEET7	0.4651
	AtSWEET8	0.4357
	AtSWEET9	0.2962
	AtSWEET10	0.2637
	AtSWEET11	0.2749
	AtSWEET12	0.2718
	AtSWEET13	0.261
	AtSWEET14	0.2553
	AtSWEET15	0.2517
	AtSWEET16	0.2952
	AtSWEET17	0.3699
	OsSWEET5	0.5188
	SlSWEET5b	0.6303
	CmeSWEET5	0.9244
	CpSWEET5	0.8613
	CmoSWEET5	0.8613
	CmaSWEET5	0.8571
	BhSWEET5	0.8277
	McSWEET5	0.7311
	RcSWEET5	0.7143
	ZjSWEET5	0.6891
	PgSWEET5	0.6542
	The amino acid sequences of the SWEET proteins used for analysis are listed in Table S3.
