# Supplementary material for: Functional Characterization of CsSWEET5a, a Cucumber Hexose Transporter That Mediates the Hexose Supply for Pollen Development and Rescues Male Fertility in Arabidopsis
Source: Int J Mol Sci. 2024 Jan 22;25(2):1332. doi: 10.3390/ijms25021332 (PMC10816302; doi:10.3390/ijms25021332)
Supplement: Supplementary file 1 [file ijms-25-01332-s001.zip › Table S3.xlsx]

## Sheet: Sheet1
Table S3. Amino acid sequences of the SWEET proteins used in multiple sequence alignment and phylogenetic analysis.
Plant species	Proteins	Accesssions	Sequences
Cucumis sativus	CsSWEET5a	OR900513	MVNTETARTVIGIIGNVISFGLFMSPIPTFVKIIKHKAVEDFKPDPYLATILNCAMWVFYGMPFVHPDSILVVTINGIGFFIEAVYVSIFFIYSPWAKKKKMMVILLIETIFFAVVVVITLLVFHTTTTRTYFVGILCIIFNIGMYTSPLTVMRLVIKTRSVKYMPFTLSLANFCNGIVWAIYAILKFDPNVLIPNSLGALSGLIQLILYATYYKTTNWDSDDSSRSKRPEVQMTDNV
Oryza sativa	OsSWEET5	XP_015638818	MVMNPDAVRNVVGIIGNLISFGLFLSPLPTFVTIVKKKDVEEFVPDPYLATFLNCALWVFYGLPFIHPNSILVVTINGTGLLIEIAYLAIYFAYAPKPKRCRMLGVLTVELVFLAAVAAGVLLGAHTYDKRSLIVGTLCVFFGTLMYAAPLTIMKQVIATKSVEYMPFTLSLVSFINGICWTIYAFIRFDILITIPNGMGTLLGAAQLILYFCYYDGSTAKNKGALELPKDGDSSAV
Solanum lycopersicum	SlSWEET5b	NP_001307814	MADPDTTRTVVGIIGNVISFFLFLSPGPTFVQILKAKSVMEFKPDPYIATVLNCAVWVFYGMPFVHPDSLLVITINGFGLAIELLYVSIFFIYSDWSKRQKIIIALVIEAIFMAILIFVTLTFLHGTKDRSMLIGIVAIVFNIIMYTSPLTVMKKVITTKSVKYMPFYLSLANFANGIVWACYALLKFDPYILIPNGLGSLSGLVQLILFAAFYRTTNWDEDEKEVELSTSKSNKSDV
Cucumis melo	CmeSWEET5	XP_008438271	MVSTETARTVIGIIGNVISFGLFMSPIPTFVQIIKHKAVEDFKPDPYLATILNCAMWVFYGMPFVHPDSLLVITINSIGFFIELIYVSIFFLYSPWAKKKKMLIILLIETIFFAVVVVITLLVFHTTITRSYFVGILCIIFNIGMYTSPLTVMRLVIKTRSVKYMPFTLSLANFCNGIVWAIYALLKFDPNVLIPNSLGALSGLIQLILYATYYRTTNWDSDGSTRPRRPEVQMTDNV
Cucurbita pepo	CpSWEET5	XP_023520311	MVSTAAARTVIGIIGNVISFGLFMSPIPTFTQIVKRKAVEDFKPDPYLATILNCAMWVFYGMPFVHPDSILVVTINGIGFFIELAYVSIFFIYSPWIKRRKMLIVLLIESIFFAAVVLITLLVFHTTISRSYFVGILCIIFNIGMYTSPLTVMRLVIKTKSVKYMPFTLSLANFCNGIVWAIYALLKFDPNVLIPNSLGALSGLIQLILYATYYRTTNWDNDDTSSTRRAEVQMSDV
Cucurbita moschata	CmoSWEET5	XP_022924129	MVSTAAARTVIGIIGNVISFGLFMSPIPTFTQIVKRKAVEDFKPDPYLATILNCAMWVFYGMPFVHPDSILVVTINGIGFFIELAYVSIFFIYSPWIKRRKMLIVLLIESIFFATVVLITLLVFHTTISRSYFVGILCIIFNIGMYTSPLTVMRLVIKTKSVKYMPFTLSLANFCNGIVWAIYALLKFDPNVLIPNSLGALSGLIQLILYATYYRTTNWDNDDTSSTRRAEVQMSDV
Cucurbita maxima	CmaSWEET5	XP_023000664	MVSTATARTVIGIIGNVISFGLFMSPIPTFTQIVKRKAVEDFKPDPYLATILNCAMWVFYGMPFVHPDSILVVTINGIGFVIEFAYVSIFFIYSPWIKRRKMLIILLIESIFFAAVVLITLLIFHTTISRSYFVGILCIIFNIGMYTSPLTVMRLVIKTK SVKYMPFTLSLANFCNGIVWAIYALLKFDPNVLIPNSLGALSGLIQLILYATYYRTTNWDNEDTSSTRRAEVQMSDV
Benincasa hispida	BhSWEET5	XP_038895910	FDCVLSGNVISFGLFMSPIPTFAQIVRRKAVEDFKPDPYLATILNCAMWVFYGMPFVHPDSLLVVTINGIGFFIELAYVSIFFIYSPWVKRKKMLIILFIETIFFTVVVLITLLVFHNTTSRSYFVGILCIIFNIGMYTSPLTVMRLVIKTRSVKYMPFTLSLANFCNGIVWAVYALLKFDPNVLIPNGLGALSGLIQLILYATYYRTTNWDSDDTSSSKKPEVQMTNV
Momordica charantia	McSWEET5	XP_022137300	LHLVWNVLSFGLFMSPIPTFTAIIRRNAVEDFKPDAYLATVLNCAMWVFYGMPFVHPDSILVVTINSIGLFTEIVYVSIFFTYSPWSKRKKLLIFLLCEAIFFACVVVITMKVWHTTKERTFFVGIICIIFNICMYTSPLTIMRLVIKTKSVKYMPFTLSLASFCNGIIWAVYALLKFDPNVLIPNSLGALSGLIQLILYATYYRTTKWEEDDIPRTSAVQMNDVV
Rosa chinensis	RcSWEET5	XP_024178767	MVNTDAIRTVVGIIGNVISFGLFTSPIPTFVKIIKDKSVRDFKADPYVATLLNCAMWSFYGLPIVHPDSLLVVTINGAGFFIELIYVSIFLLYSPAQKRRKIISALLVEAIFFAVVVFITIHVFHTTKDRSMIIGILCIIFNIIMYASPLTVMKMVIKTKSVKYMPFALSLANFCNGVVWSIYALLKFDPYVLIPNGLGSLSGLVQLILYGTYYRTTNWDDNDEKPKPEVELPKV
Ziziphus jujuba	ZjSWEET5	XP_015868276	MVNTDAVRTVVGILGNVISFGLFLSPSPTISTIIKHKSVQDFKPDPYVATVLNCAMWVLYGLPMVHPDSILVITINGIGFVIEFIYVSIFFIYSSWANRRKILIILAIEAVFVTIIAVVTLNAFHNTDDRSMFVGILAIIFNVIMYASPLTVMRMVIKTKSVKYMPFFLSLANFCNGVVWVVYALLKFDQYILIPNALGTGSGLIQLILYATYYKTTQWDEDEKPRSEVQLSNA
Punica granatum	PgSWEET5	XP_031406106	MVSTETVRTIVGIIGNVISFGLFLSPVPTMVKIYKNKSVQAFKPDPYVMTVLNCMMWVFYGMPFVHPDSTLVWTINGAGLIMELIYVSVFLIYSNWPIRRKILVVLLIEVIFMAAVVLVTMLALHTTKKRTLVVGILAIIFNIGMYASPLTVMKRVIKTRSVKYMPFYLSLANFANGLIWTVYALLKFDINLLLPNGLGALSGLVQLILYAIYYKSTKWDDEPEKPTANVQLSRTNNNNA
Arabidopsis thaliana	AtSWEET1	AT1G21460	MNIAHTIFGVFGNATALFLFLAPSITFKRIIKNKSTEQFSGIPYPMTLLNCLLSAWYGLPFVSKDNTLVSTINGTGAVIETVYVLIFLFYAPKKEKIKIFGIFSCVLAVFATVALVSLFALQGNGRKLFCGLAATVFSIIMYASPLSIMRLVVKTKSVEFMPFFLSLFVFLCGTSWFVYGLIGRDPFVAIPNGFGCALGTLQLILYFIYCGNKGEKSADAQKDEKSVEMKDDEKKQNVVNGKQDLQV
Arabidopsis thaliana	AtSWEET2	AT3G14770	MDVFAFNASLSMCKDVAGIAGNIFAFGLFVSPMPTFRRIMRNKSTEQFSGLPYIYALLNCLICLWYGTPFISHSNAMLMTVNSVGATFQLCYIILFIMHTDKKNKMKMLGLLFVVFAVVGVIVAGSLQIPDQLTRWYFVGFLSCGSLVSMFASPLFVINLVIRTKSVEFMPFYLSLSTFLMSASFLLYGLFNSDAFVYTPNGIGTILGIVQLALYCYYHRNSIEEETKEPLIVSYV
Arabidopsis thaliana	AtSWEET3	AT5G53190	MGDKLRLSIGILGNGASLLLYTAPIVTFSRVFKKKSTEEFSCFPYVMTLFNCLIYTWYGLPIVSHLWENLPLVTINGVGILLESIFIFIYFYYASPKEKIKVGVTFVPVIVGFGLTTAISALVFDDHRHRKSFVGSVGLVASISMYGSPLVVMKKVIETRSVEYMPFYLSFFSFLASSLWLAYGLLSHDLFLASPNMVATPLGILQLILYFKYKNKKDLAPTTMVITKRNDHDDKNKATLEFVVDVDRNSDTNEKNSNNASSI
Arabidopsis thaliana	AtSWEET4	AT3G28007	MVNATVARNIAGICGNVISLFLFLSPIPTFITIYKKKKVEEYKADPYLATVLNCALWVFYGLPMVQPDSLLVITINGTGLAIELVYLAIFFFFSPTSRKVKVGLWLIGEMVFVGIVATCTLLLFHTHNQRSSFVGIFCVIFVSLMYIAPLTIMSKVIKTKSVKYMPFSLSLANFLNGVVWVIYALIKFDLFILIGNGLGTVSGAVQLILYACYYKTTPKDDEDEEDEENLSKVNSQLQLSGNSGQAKRVSA
Arabidopsis thaliana	AtSWEET5	AT5G62850	MTDPHTARTIVGIVGNVISFGLFCAPIPTMVKIWKMKSVSEFKPDPYVATVLNCMMWTFYGLPFVQPDSLLVITINGTGLFMELVYVTIFFVFATSPVRRKITIAMVIEVIFMAVVIFCTMYFLHTTKQRSMLIGILCIVFNVIMYAAPLTVMKLVIKTKSVKYMPFFLSLANFMNGVVWVIYACLKFDPYILIPNGLGSLSGIIQLIIYITYYKTTNWNDDDEDKEKRYSNAGIELGQA
Arabidopsis thaliana	AtSWEET6	AT1G66770	MVHEQLNLIRKIVGILGNFISLCLFLSPTPTFIHIVKKKSVEKYSPLPYLATLLNCLVRALYGLPMVHPDSTLLVTISGIGITIEIVFLTIFFVFCGRQQHRLVISAVLTVQVVFVATLAVLVLTLEHTTDQRTISVGIVSCVFNAMMYASPLSVMKMVIKTKSLEFMPFLLSVVGFLNAGVWTIYGFVPFDPFLAIPNGIGCVFGLVQLILYGTYYKSTKGIMEERKNRLGYVGEVGLSNAIAQTEPENIPYLNKRVSGV
Arabidopsis thaliana	AtSWEET7	AT4G10850	MVFAHLNLLRKIVGIIGNFIALCLFLSPTPTFVRIVKKKSVEEYSPIPYLATLINCLVWVLYGLPTVHPDSTLVITINGTGILIEIVFLTIFFVYCGRQKQRLIISAVIAAETAFIAILAVLVLTLQHTTEKRTMSVGIVCCVFNVMMYASPLSVMKMVIKTKSVEFMPFWLSVAGFLNAGVWTIYALMPFDPFMAIPNGIGCLFGLAQLILYGAYYKSTKRIMAERENQPGYVGLSSAIARTGSEKTANTNQEPNNV
Arabidopsis thaliana	AtSWEET8	AT5G40260	MVDAKQVRFIIGVIGNVISFGLFAAPAKTFWRIFKKKSVEEFSYVPYVATVMNCMLWVFYGLPVVHKDSILVSTINGVGLVIELFYVGVYLMYCGHKKNHRRNILGFLALEVILVVAIILITLFALKGDFVKQTFVGVICDVFNIAMYGAPSLAIIKVVKTKSVEYMPFLLSLVCFVNAGIWTTYSLIFKIDYYVLASNGIGTFLALSQLIVYFMYYKSTPKEKTVKPSEVEISATERV
Arabidopsis thaliana	AtSWEET9	AT2G39060	MFLKVHEIAFLFGLLGNIVSFGVFLSPVPTFYGIYKKKSSKGFQSIPYICALASATLLLYYGIMKTHAYLIISINTFGCFIEISYLFLYILYAPREAKISTLKLIVICNIGGLGLLILLVNLLVPKQHRVSTVGWVCAAYSLAVFASPLSVMRKVIKTKSVEYMPFLLSLSLTLNAVMWFFYGLLIKDKFIAMPNILGFLFGVAQMILYMMYQGSTKTDLPTENQLANKTDVNEVPIVAVELPDVGSDNVEGSVRPMK
Arabidopsis thaliana	AtSWEET10	AT5G50790	MAISQAVLATVFGILGNIISFFVCLAPIPTFVRIYKRKSSEGYQSIPYVISLFSAMLWMYYAMIKKDAMMLITINSFAFVVQIVYISLFFFYAPKKEKTLTVKFVLFVDVLGFGAIFVLTYFIIHANKRVQVLGYICMVFALSVFVAPLGIIRKVIKTKSAEFMPFGLSFFLTLSAVMWFFYGLLLKDMNIALPNVLGFIFGVLQMILFLIYKKPGTKVLEPPGIKLQDISEHVVDVVRLSTMVCNSQMRTLVPQDSADMEATIDIDEKIKGDIEKNKDEKEVFLISKN
Arabidopsis thaliana	AtSWEET11	AT3G48740	MSLFNTENTWAFVFGLLGNLISFAVFLSPVPTFYRIWKKKTTEGFQSIPYVVALFSATLWLYYATQKKDVFLLVTINAFGCFIETIYISMFLAYAPKPARMLTVKMLLLMNFGGFCAILLLCQFLVKGATRAKIIGGICVGFSVCVFAAPLSIIRTVIKTRSVEYMPFSLSLTLTISAVIWLLYGLALKDIYVAFPNVLGFALGALQMILYVVYKYCKTSPHLGEKEVEAAKLPEVSLDMLKLGTVSSPEPISVVRQANKCTCGNDRRAEIEDGQTPKHGKQSSSAAAT
Arabidopsis thaliana	AtSWEET12	At5G23660	MALFDTHNTWAFVFGLLGNLISFAVFLSPVPTFYRICKKKTTEGFQSIPYVVALFSAMLWLYYATQKKDVFLLVTINSFGCFIETIYISIFVAFASKKARMLTVKLLLLMNFGGFCLILLLCQFLAKGTTRAKIIGGICVGFSVCVFAAPLSIIRTVIKTKSVEYMPFSLSLTLTISAVIWLLYGLALKDIYVAFPNVIGFVLGALQMILYVVYKYCKTPSDLVEKELEAAKLPEVSIDMVKLGTLTSPEPVAITVVRSVNTCNCNDRNAEIENGQGVRNSAATT
Arabidopsis thaliana	AtSWEET13	AT5G50800	MALTNNLWAFVFGILGNIISFVVFLAPVPTFVRICKKKSTEGFQSLPYVSALFSAMLWIYYAMQKDGTAFLLITINAFGCVIETIYIVLFVSYANKKTRISTLKVLGLLNFLGFAAIVLVCELLTKGSTREKVLGGICVGFSVSVFAAPLSIMRVVVRTRSVEFMPFSLSLFLTISAVTWLFYGLAIKDFYVALPNVLGAFLGAVQMILYIIFKYYKTPVAQKTDKSKDVSDHSIDIAKLTTVIPGAVLDSAVHQPPALHNVPETKIQLTEVKSQNMTDPKDQINKDVQKQSQV
Arabidopsis thaliana	AtSWEET14	At4G25010	MVLTHNVLAVTFGVLGNIISFIVFLAPVPTFVRICKKKSIEGFESLPYVSALFSAMLWIYYALQKDGAGFLLITINAVGCFIETIYIILFITYANKKARISTLKVLGLLNFLGFAAIILVCELLTKGSNREKVLGGICVGFSVCVFAAPLSIMRVVIRTKSVEFMPFSLSLFLTISAITWLFYGLAIKDFYVALPNILGAFLGAVQMILYVIFKYYKTPLVVDETEKPKTVSDHSINMVKLSSTPASGDLTVQPQTNPDVSHPIKTHGGDLEDQMDKKMPN
Arabidopsis thaliana	AtSWEET15	AT5G13170	MGVMINHHFLAFIFGILGNVISFLVFLAPVPTFYRIYKRKSTESFQSLPYQVSLFSCMLWLYYALIKKDAFLLITINSFGCVVETLYIAMFFAYATREKRISAMKLFIAMNVAFFSLILMVTHFVVKTPPLQVSVLGWICVAISVSVFAAPLMIVARVIKTKSVEYMPFTLSFFLTISAVMWFAYGLFLNDICIAIPNVVGFVLGLLQMVLYLVYRNSNEKPEKINSSEQQLKSIVVMSPLGVSEVHPVVTESVDPLSEAVHHEDLSKVTKVEEPSIENGKCYVEATRPETV
Arabidopsis thaliana	AtSWEET16	At3G16690	MWTGQTQSSVLIICYLSHPISSLSLSTFLRNPSSEMADLSFYVGVIGNVISVLVFLSPVETFWRIVQRRSTEEYECFPYICTLMSSSLWTYYGIVTPGEYLVSTVNGFGALAESIYVLIFLFFVPKSRFLKTVVVVLALNVCFPVIAIAGTRTLFGDANSRSSSMGFICATLNIIMYGSPLSAIKTVVTTRSVQFMPFWLSFFLFLNGAIWGVYALLLHDMFLLVPNGMGFFLGIMQLLIYAYYRNAEPIVEDEEGLIPNQPLLA
Arabidopsis thaliana	AtSWEET17	At4G15920	MAEASFYIGVIGNVISVLVFLSPVETFWKIVKRRSTEEYKSLPYICTLLGSSLWTYYGIVTPGEYLVSTVNGFGALVETIYVSLFLFYAPRHLKLKTVDVEAMLNVFFPIAAIVATRSAFEDEKMRSQSIGFISAGLNIIMYGSPLSAMKTVVTTKSVKYMPFWLSFFLFLNGAIWAVYALLQHDVFLLVPNGVGFVFGTMQLILYGIYRNAKPVGLSNGLSEIAQDEEEGLTSRVEPLLS
