# Supplementary material for: Functional Characterization of CsSWEET5a, a Cucumber Hexose Transporter That Mediates the Hexose Supply for Pollen Development and Rescues Male Fertility in Arabidopsis
Source: Int J Mol Sci. 2024 Jan 22;25(2):1332. doi: 10.3390/ijms25021332 (PMC10816302; doi:10.3390/ijms25021332)
Supplement: Supplementary file 1 [file ijms-25-01332-s001.zip › Table S4.xlsx]

## Sheet: Sheet1
	Table S4. Correlations between male flower bud lengths and pollen development stages in the cucumber inbred line C49.
	Developmental stage	Lengths of male floral buds (mm)	Morphological indications
	Stage 1-8	<1	Anther expands and anther locules differentiate morphologically
	Stage 9	≈1.5-2	Microsporocytes initiate
	Stage 10	≈3-4	Meiosis in anthers
	Stage 11	≈5-7	Uninuclear pollen appears
	Stage 12	≈8-16	Mature pollen is formed
	Stage 13	Open	Pollen release
