# Supplementary material for: Functional Characterization of CsSWEET5a, a Cucumber Hexose Transporter That Mediates the Hexose Supply for Pollen Development and Rescues Male Fertility in Arabidopsis
Source: Int J Mol Sci. 2024 Jan 22;25(2):1332. doi: 10.3390/ijms25021332 (PMC10816302; doi:10.3390/ijms25021332)
Supplement: Supplementary file 1 [file ijms-25-01332-s001.zip › Table S5.xlsx]

## Sheet: Sheet1
	Table S5. Primers used in this study.
	PCR purpose	Primer name	Primer sequence (5'-3')
	Cloning of CsSWEET5a	CsSWEET5a-F	ATCTCAAAAATATTTATTAAAAAAAACCCAC
		CsSWEET5a-R	AAATGAAGTAAGACTATATTTCAAAAAGAAT
	pCsSWEET5a-GUS construct	Pro-CsSWEET5a-F	GGGGACAAGTTTGTACAAAAAAGCAGGCTTAATCCTCCAGTTTGTTGCTGTACTCA
		Pro-CsSWEET5a-R	GGGGACCACTTTGTACAAGAAAGCTGGGTATGTGACAAAAATCAAAACAACACTATT
	CsSWEET5a-YFP construct	YFP-CsSWEET5a-F	GGGGACAAGTTTGTACAAAAAAGCAGGCTTAATGGTGAATACAGAGACAGCAAGAA
		YFP-CsSWEET5a-R	GGGGACCACTTTGTACAAGAAAGCTGGGTACACATTATCTGTCATTTGCACCT
	Expression of CsSWEET5a in yeast construct	Yeast-CsSWEET5a-F	GGGGACAAGTTTGTACAAAAAAGCAGGCTTAATGGTGAATACAGAGACAGCAAGAA
		Yeast-CsSWEET5a-R	GGGGACCACTTTGTACAAGAAAGCTGGGTACTACACATTATCTGTCATTTGCACCT
	CsSWEET5a overexpression construct	O-CsSWEET5a-F	GGGGACAAGTTTGTACAAAAAAGCAGGCTTAATGGTGAATACAGAGACAGCAAGAA
		O-CsSWEET5a-R	GGGGACCACTTTGTACAAGAAAGCTGGGTACTACACATTATCTGTCATTTGCACCT
	Expression of AtSWEET1 in yeast construct	Yeast-AtSWEET1-F	GGGGACAAGTTTGTACAAAAAAGCAGGCTTAATGAACATCGCTCACACTATCTT
		Yeast-AtSWEET1-R	GGGGACCACTTTGTACAAGAAAGCTGGGTATTAAACTTGAAGGTCTTGCTTTCC
	Expression of AtSWEET12 in yeast construct	Yeast-AtSWEET12-F	GGGGACAAGTTTGTACAAAAAAGCAGGCTTAATGGCTCTCTTCGACACTCATAAC
		Yeast-AtSWEET12-R	GGGGACCACTTTGTACAAGAAAGCTGGGTATCAAGTAGTTGCAGCACTGTTTCT
	qRT-PCR of CsSWEET1	q-CsSWEET1-F	TGCCATTTTTGCTGTCGCT
		q-CsSWEET1-R	TCGTTATTAGTGGGTTTCTCATCTG
	qRT-PCR of CsSWEET2	q-CsSWEET2-F	TTCTTCTCGGTTCCATCTTCTCA
		q-CsSWEET2-R	CATACCATAGGCAAATAAGGCAGT
	qRT-PCR of CsSWEET3	q-CsSWEET3-F	AAGAGTGTTGAGTTTATGCCATTTTATT
		q-CsSWEET3-R	TAGATTTGGAGACGCAAGGAAGA
	qRT-PCR of CsSWEET5a	q-CsSWEET5a-F	AGTCATCAAAACAAGGAGTGTGAA
		q-CsSWEET5a-R	GACGTTAGGATCGAACTTGAGAAT
	qRT-PCR of CsSWEET5b	q-CsSWEET5b-F	ATAAGAGCAAATCAGTGGAGGAGT
		q-CsSWEET5b-R	ATTCAGCATACCAACAGAAGATAGC
	qRT-PCR of CsSWEET5c	q-CsSWEET5c-F	ACCTAACAGGTTCGAAAGTGGA
		q-CsSWEET5c-R	TTGCATGGTCCTTCTATGACAG
	qRT-PCR of CsSWEET7a	q-CsSWEET7a-F	GCCTCTCTCACTCTCTGTTGCTT
		q-CsSWEET7a-R	AACCACCTGCCCTTTTCCTT
	qRT-PCR of CsSWEET7b	q-CsSWEET7b-F	ATCCAGGTAGCATACTCGTCGT
		q-CsSWEET7b-R	TGAGAACCAAGAGGGCTAAGAG
	qRT-PCR of CsSWEET9	q-CsSWEET9-F	AACTTGGGGTTTAGCGGAGT
		q-CsSWEET9-R	ATTGAAGGCTGCACAAATCC
	qRT-PCR of CsSWEET10	q-CsSWEET10-F	CCGCATCCCAGTGAAGG
		q-CsSWEET10-R	TTGGCTGAAGAACTGTGACG
	qRT-PCR of CsSWEET12a	q-CsSWEET12a-F	CCCCAACACAAAGCCGAT
		q-CsSWEET12a-R	ATTGAGGAGGTGGTGGAGGA
	qRT-PCR of CsSWEET12b	q-CsSWEET12b-F	TGGCTTCTTTACGGTGTATTTCTC
		q-CsSWEET12b-R	TGTGGCTGCGCTAACGATT
	qRT-PCR of CsSWEET12c	q-CsSWEET12c-F	TGTTTTACAGAAAGTATGAGATAGCCA
		q-CsSWEET12c-R	GTTGCCGTTGCTGAGTTCG
	qRT-PCR of CsSWEET15	q-CsSWEET15-F	TGTGTTGCTGTTTCTGTCTCTGT
		q-CsSWEET15-R	CACCATTTGAAGTAACCCCAATA
	qRT-PCR of CsSWEET17a	q-CsSWEET17a-F	TCAATGCTGGTATTTGGTCTGC
		q-CsSWEET17a-R	TCCTTCATCCTCCATCATCTCC
	qRT-PCR of CsSWEET17b	q-CsSWEET17b-F	GTTAGAACAACAACTTTAGTGGCAA
		q-CsSWEET17b-R	CTAGGGGTGAACCGCAATTTA
	qRT-PCR of CsSWEET17c	q-CsSWEET17c-F	AGGGATTATGGTAGGGATTTTG
		q-CsSWEET17c-R	CTCCTGCTCTTTATCACCGTTT
	Reference gene in cucumber	Actin-F	CCACGAAACTACTTACAACTCCATC
		Actin-R	GGGCTGTGATTTCCTTGCTC
